# Supplementary material for: Identification and Characterization of Resistance to Rust in Lentil and Its Wild Relatives
Source: MDPI journal article supplement (doi:10.3390/plants12030626), 2023-01-31
Supplement: s1 [file s1]

# Identification and characterization of resistance to rust in lentil and its wild relatives

Eleonora Barilli and Diego Rubiales

**Supplementary table 1:** Response of the *Lens* germplasm accessions to *U. viciae-fabae* ex *L. culinaris* studied. DS = Disease Severity (%); IT = Infection Type according Stakman et al. (1962) [29], where IT 0 = no symptoms, IT ; = necrotic flecks, IT 1 = min pustules barely sporulating, IT 2 = necrotic halo surrounding small pustules, IT 3 = chlorotic halo and IT 4 = well-formed pustules with no associated chlorosis or necrosis.

Ns = not studied

| Accession code | Donnor's code | species               | origin | Field tests |      | Seedling tests under controlled conditions |    |             |    |             |    |             |    |       |
|----------------|---------------|-----------------------|--------|-------------|------|--------------------------------------------|----|-------------|----|-------------|----|-------------|----|-------|
|                |               |                       |        | Isolate SPA |      |                                            |    |             |    |             |    |             |    |       |
|                |               |                       |        | 2014        | 2015 | Isolate SPA                                |    | Isolate MOR |    | Isolate FRA |    | Isolate ALG |    |       |
|                |               |                       |        | DS(%)       | IT   | DS(%)                                      | IT | DS(%)       | IT | DS(%)       | IT | DS(%)       | IT | DS(%) |
| 1001           | BGE000996     | <i>L.c. culinaris</i> | Spain  | 73          | 4    | 12                                         | 4  | 30          | 4  | 30          | 4  | 70          | 4  | 13    |
| 1002           | BGE001017     | <i>L.c. culinaris</i> | Spain  | 45          | 4    | 15                                         | 4  | 28          | 4  | 43          | ns | ns          | ns | ns    |
| 1003           | BGE001023     | <i>L.c. culinaris</i> | Spain  | 53          | 4    | 25                                         | 4  | 33          | 4  | 40          | 4  | 33          | ns | ns    |
| 1004           | BGE001048     | <i>L.c. culinaris</i> | Spain  | 55          | 4    | 48                                         | 4  | 27          | 4  | 20          | 4  | 30          | 4  | 13    |
| 1005           | BGE001055     | <i>L.c. culinaris</i> | Spain  | 77          | 4    | 30                                         | 4  | 43          | 4  | 22          | ns | ns          | ns | ns    |
| 1006           | BGE001078     | <i>L.c. culinaris</i> | Spain  | 60          | ns   | ns                                         | 4  | 50          | 4  | 18          | ns | ns          | ns | ns    |
| 1007           | BGE001080     | <i>L.c. culinaris</i> | Spain  | 53          | 4    | 43                                         | 4  | 60          | 4  | 13          | 4  | 13          | ns | ns    |
| 1008           | BGE001087     | <i>L.c. culinaris</i> | Spain  | 53          | 4    | 25                                         | 4  | 37          | 4  | 43          | ns | ns          | ns | ns    |
| 1009           | BGE001119     | <i>L.c. culinaris</i> | Spain  | 40          | 4    | 55                                         | 4  | 47          | ns | ns          | ns | ns          | ns | ns    |
| 1010           | BGE001140     | <i>L.c. culinaris</i> | Spain  | 60          | 4    | 23                                         | 4  | 30          | ns | ns          | ns | ns          | ns | ns    |
| 1011           | BGE001150     | <i>L.c. culinaris</i> | Spain  | 60          | 4    | 25                                         | 4  | 40          | ns | ns          | ns | ns          | ns | ns    |
| 1012           | BGE001172     | <i>L.c. culinaris</i> | Spain  | 25          | 4    | 43                                         | 4  | 47          | 4  | 23          | 4  | 5           | 4  | 17    |
| 1013           | BGE001378     | <i>L.c. culinaris</i> | Spain  | 57          | 4    | 16                                         | 4  | 53          | 4  | 47          | 4  | 28          | ns | ns    |
| 1014           | BGE001394     | <i>L.c. culinaris</i> | Spain  | 20          | 4    | 25                                         | 4  | 25          | 4  | 37          | 4  | 13          | ns | ns    |
| 1015           | BGE001398     | <i>L.c. culinaris</i> | Spain  | ns          | ns   | ns                                         | 4  | 32          | ns | ns          | ns | ns          | ns | ns    |

|      |           |                       |       |    |    |    |   |    |    |    |    |    |    |    |
|------|-----------|-----------------------|-------|----|----|----|---|----|----|----|----|----|----|----|
| 1016 | BGE001402 | <i>L.c. culinaris</i> | Spain | 30 | ns | ns | 4 | 40 | ns | ns | ns | ns | ns | ns |
| 1017 | BGE001409 | <i>L.c. culinaris</i> | Spain | 40 | 4  | 35 | 4 | 47 | 4  | 50 | ns | ns | ns | ns |
| 1018 | BGE001415 | <i>L.c. culinaris</i> | Spain | 15 | 4  | 15 | 4 | 40 | 4  | 12 | ns | ns | 4  | 2  |
| 1019 | BGE001430 | <i>L.c. culinaris</i> | Spain | 43 | 4  | 35 | 4 | 30 | 4  | 22 | 4  | 12 | 4  | 8  |
| 1020 | BGE001431 | <i>L.c. culinaris</i> | Spain | 50 | 4  | 19 | 4 | 37 | ns | ns | ns | ns | ns | ns |
| 1021 | BGE001443 | <i>L.c. culinaris</i> | Spain | 63 | 4  | 27 | 4 | 38 | ns | ns | ns | ns | ns | ns |
| 1022 | BGE001459 | <i>L.c. culinaris</i> | Spain | 45 | 4  | 27 | 4 | 47 | ns | ns | ns | ns | ns | ns |
| 1023 | BGE001483 | <i>L.c. culinaris</i> | Spain | 60 | 4  | 35 | 4 | 25 | ns | ns | ns | ns | ns | ns |
| 1024 | BGE019708 | <i>L.c. culinaris</i> | Spain | 43 | 4  | 24 | 4 | 43 | 4  | 30 | ns | ns | 4  | 17 |
| 1025 | BGE001495 | <i>L.c. culinaris</i> | Spain | 45 | 4  | 10 | 4 | 57 | ns | ns | ns | ns | ns | ns |
| 1026 | BGE001499 | <i>L.c. culinaris</i> | Spain | 55 | 4  | 28 | 4 | 40 | 4  | 47 | 4  | 50 | 4  | 10 |
| 1027 | BGE001500 | <i>L.c. culinaris</i> | Spain | 52 | 4  | 22 | 4 | 33 | ns | ns | ns | ns | ns | ns |
| 1028 | BGE001528 | <i>L.c. culinaris</i> | Spain | 30 | ns | 14 | 4 | 30 | 4  | 28 | 4  | 15 | 4  | 8  |
| 1029 | BGE008329 | <i>L.c. culinaris</i> | Spain | 60 | 4  | 20 | 4 | 32 | 4  | 33 | ns | ns | 4  | 12 |
| 1030 | BGE001805 | <i>L.c. culinaris</i> | Spain | 40 | 4  | 14 | 4 | 48 | 4  | 43 | 4  | 40 | 4  | 13 |
| 1031 | BGE001808 | <i>L.c. culinaris</i> | Spain | 60 | 4  | 12 | 4 | 40 | 4  | 33 | ns | ns | ns | ns |
| 1032 | BGE001814 | <i>L.c. culinaris</i> | Spain | 47 | 4  | 19 | 4 | 40 | 4  | 40 | 4  | 53 | 4  | 8  |
| 1033 | BGE001815 | <i>L.c. culinaris</i> | Spain | 37 | 4  | 5  | 4 | 40 | 4  | 37 | 4  | 53 | 4  | 23 |
| 1034 | BGE001821 | <i>L.c. culinaris</i> | Spain | 40 | 4  | 35 | 4 | 53 | ns | ns | ns | ns | ns | ns |
| 1035 | BGE001823 | <i>L.c. culinaris</i> | Spain | 65 | 4  | 14 | 4 | 53 | ns | ns | ns | ns | ns | ns |
| 1036 | BGE001824 | <i>L.c. culinaris</i> | Spain | 55 | 4  | 23 | 4 | 35 | 4  | 30 | 4  | 60 | 4  | 20 |
| 1037 | BGE001833 | <i>L.c. culinaris</i> | Spain | 35 | 4  | 40 | 4 | 57 | 4  | 20 | ns | ns | ns | ns |
| 1038 | BGE001835 | <i>L.c. culinaris</i> | Spain | 63 | 4  | 10 | 4 | 60 | 4  | 22 | ns | ns | ns | ns |
| 1039 | BGE001836 | <i>L.c. culinaris</i> | Spain | 47 | 4  | 40 | 4 | 43 | 4  | 53 | 4  | 67 | 4  | 20 |
| 1040 | BGE001845 | <i>L.c. culinaris</i> | Spain | 43 | 4  | 35 | 4 | 50 | ns | ns | ns | ns | ns | ns |
| 1041 | BGE001846 | <i>L.c. culinaris</i> | Spain | 50 | 4  | 35 | 4 | 47 | ns | ns | ns | ns | ns | ns |
| 1042 | BGE001850 | <i>L.c. culinaris</i> | Spain | 60 | 4  | 38 | 4 | 53 | 4  | 37 | ns | ns | ns | ns |
| 1043 | BGE001851 | <i>L.c. culinaris</i> | Spain | 60 | 4  | 33 | 4 | 35 | 4  | 27 | 4  | 70 | 4  | 7  |
| 1044 | BGE001853 | <i>L.c. culinaris</i> | Spain | 47 | 4  | 25 | 4 | 63 | 4  | 47 | ns | ns | ns | ns |
| 1045 | BGE001854 | <i>L.c. culinaris</i> | Spain | 50 | 4  | 28 | 4 | 67 | 4  | 53 | 4  | 57 | 4  | 43 |
| 1046 | BGE001862 | <i>L.c. culinaris</i> | Spain | 37 | 4  | 25 | 4 | 47 | 4  | 53 | 4  | 18 | 4  | 30 |
| 1047 | BGE001867 | <i>L.c. culinaris</i> | Spain | 57 | 4  | 15 | 4 | 60 | 4  | 37 | 4  | 40 | 4  | 33 |
| 1048 | BGE001868 | <i>L.c. culinaris</i> | Spain | 50 | 4  | 40 | 4 | 40 | 4  | 50 | ns | ns | ns | ns |
| 1049 | BGE001875 | <i>L.c. culinaris</i> | Spain | 67 | 4  | 28 | 4 | 60 | 4  | 25 | ns | ns | ns | ns |
| 1050 | BGE001879 | <i>L.c. culinaris</i> | Spain | 75 | 4  | 50 | 4 | 28 | ns | ns | ns | ns | ns | ns |
| 1051 | BGE001880 | <i>L.c. culinaris</i> | Spain | 47 | 4  | 28 | 4 | 30 | 4  | 33 | 4  | 18 | 4  | 5  |
| 1052 | BGE001884 | <i>L.c. culinaris</i> | Spain | 50 | 4  | 35 | 4 | 47 | 4  | 28 | 4  | 50 | 4  | 10 |
| 1053 | BGE001890 | <i>L.c. culinaris</i> | Spain | 55 | 4  | 28 | 4 | 50 | ns | ns | ns | ns | ns | ns |
| 1054 | BGE001899 | <i>L.c. culinaris</i> | Spain | 40 | 4  | 23 | 4 | 57 | 4  | 18 | ns | ns | ns | ns |

|      |           |                       |       |    |   |    |   |    |    |    |    |    |    |    |
|------|-----------|-----------------------|-------|----|---|----|---|----|----|----|----|----|----|----|
| 1055 | BGE001908 | <i>L.c. culinaris</i> | Spain | 43 | 4 | 43 | 4 | 47 | ns | ns | ns | ns | ns | ns |
| 1056 | BGE001914 | <i>L.c. culinaris</i> | Spain | 53 | 4 | 19 | 4 | 37 | 4  | 28 | ns | ns | ns | ns |
| 1057 | BGE001920 | <i>L.c. culinaris</i> | Spain | 45 | 4 | 27 | 4 | 25 | ns | ns | ns | ns | ns | ns |
| 1058 | BGE001924 | <i>L.c. culinaris</i> | Spain | 33 | 4 | 25 | 4 | 37 | 4  | 20 | ns | ns | ns | ns |
| 1059 | BGE002058 | <i>L.c. culinaris</i> | Spain | 70 | 4 | 30 | 4 | 40 | 4  | 22 | 4  | 22 | 4  | 37 |
| 1060 | BGE4243   | <i>L.c. culinaris</i> | Spain | 60 | 4 | 40 | 4 | 33 | ns | ns | ns | ns | ns | ns |
| 1061 | BGE004244 | <i>L.c. culinaris</i> | Spain | 40 | 4 | 32 | 4 | 43 | ns | ns | ns | ns | ns | ns |
| 1062 | BGE004245 | <i>L.c. culinaris</i> | Spain | 63 | 4 | 50 | 4 | 23 | ns | ns | ns | ns | ns | ns |
| 1063 | BGE004246 | <i>L.c. culinaris</i> | Spain | 63 | 4 | 15 | 4 | 22 | ns | ns | ns | ns | ns | ns |
| 1064 | BGE004247 | <i>L.c. culinaris</i> | Spain | 63 | 4 | 35 | 4 | 27 | ns | ns | ns | ns | ns | ns |
| 1065 | BGE004248 | <i>L.c. culinaris</i> | Spain | 55 | 4 | 20 | 4 | 47 | 4  | 38 | 4  | 25 | 4  | 50 |
| 1066 | BGE004249 | <i>L.c. culinaris</i> | Spain | 30 | 4 | 15 | 4 | 57 | ns | ns | ns | ns | ns | ns |
| 1067 | BGE004250 | <i>L.c. culinaris</i> | Spain | 53 | 4 | 15 | 4 | 15 | 4  | 32 | 4  | 20 | 4  | 8  |
| 1068 | BGE004251 | <i>L.c. culinaris</i> | Spain | 37 | 4 | 11 | 4 | 18 | ns | ns | ns | ns | ns | ns |
| 1069 | BGE004252 | <i>L.c. culinaris</i> | Spain | 15 | 4 | 7  | 4 | 30 | 4  | 43 | 4  | 40 | 4  | 47 |
| 1070 | BGE004420 | <i>L.c. culinaris</i> | Spain | 65 | 4 | 35 | 4 | 53 | ns | ns | ns | ns | ns | ns |
| 1071 | BGE008329 | <i>L.c. culinaris</i> | Spain | 60 | 4 | 28 | 4 | 43 | 4  | 50 | 4  | 50 | 4  | 17 |
| 1072 | BGE008688 | <i>L.c. culinaris</i> | Spain | 50 | 4 | 9  | 4 | 37 | ns | ns | ns | ns | ns | ns |
| 1073 | BGE08690  | <i>L.c. culinaris</i> | Spain | 55 | 4 | 27 | 4 | 57 | ns | ns | ns | ns | ns | ns |
| 1074 | BGE008691 | <i>L.c. culinaris</i> | Spain | 47 | 4 | 33 | 4 | 50 | ns | ns | ns | ns | ns | ns |
| 1075 | BGE008692 | <i>L.c. culinaris</i> | Spain | 45 | 4 | 43 | 4 | 50 | ns | ns | ns | ns | ns | ns |
| 1076 | BGE008693 | <i>L.c. culinaris</i> | Spain | 40 | 4 | 15 | 4 | 22 | 4  | 18 | 4  | 30 | 4  | 8  |
| 1077 | BGE008694 | <i>L.c. culinaris</i> | Spain | 47 | 4 | 32 | 4 | 25 | 4  | 47 | 4  | 27 | 4  | 27 |
| 1078 | BGE8695   | <i>L.c. culinaris</i> | Spain | 35 | 4 | 3  | 4 | 23 | 4  | 12 | ns | ns | ns | ns |
| 1079 | BGE008696 | <i>L.c. culinaris</i> | Spain | 45 | 4 | 6  | 4 | 25 | 4  | 35 | ns | ns | ns | ns |
| 1080 | BGE008697 | <i>L.c. culinaris</i> | Spain | 55 | 4 | 18 | 4 | 18 | 4  | 40 | 4  | 57 | 4  | 18 |
| 1081 | BGE008698 | <i>L.c. culinaris</i> | Spain | 53 | 4 | 18 | 4 | 22 | 4  | 23 | ns | ns | ns | ns |
| 1082 | BGE008700 | <i>L.c. culinaris</i> | Spain | 53 | 4 | 28 | 4 | 30 | 4  | 35 | ns | ns | ns | ns |
| 1083 | BGE08701  | <i>L.c. culinaris</i> | Spain | 80 | 4 | 40 | 4 | 30 | 4  | 40 | ns | ns | ns | ns |
| 1084 | BGE008726 | <i>L.c. culinaris</i> | Spain | 47 | 4 | 12 | 4 | 40 | 4  | 50 | ns | ns | ns | ns |
| 1085 | BGE008979 | <i>L.c. culinaris</i> | Spain | 26 | 4 | 23 | 4 | 28 | 4  | 37 | ns | ns | ns | ns |
| 1086 | BGE008991 | <i>L.c. culinaris</i> | Spain | 35 | 4 | 43 | 4 | 47 | ns | ns | ns | ns | ns | ns |
| 1087 | BGE089982 | <i>L.c. culinaris</i> | Spain | 45 | 4 | 37 | 4 | 20 | ns | ns | ns | ns | ns | ns |
| 1088 | BGE008986 | <i>L.c. culinaris</i> | Spain | 30 | 4 | 23 | 4 | 40 | 4  | 43 | 4  | 43 | 4  | 12 |
| 1089 | BGE011074 | <i>L.c. culinaris</i> | Spain | 75 | 4 | 35 | 4 | 37 | 4  | 53 | 4  | 63 | 4  | 12 |
| 1090 | BGE011075 | <i>L.c. culinaris</i> | Spain | 53 | 4 | 33 | 3 | 33 | 4  | 47 | 4  | 63 | 4  | 23 |
| 1091 | BGE011077 | <i>L.c. culinaris</i> | Spain | 50 | 4 | 20 | 4 | 30 | 4  | 28 | 4  | 8  | 4  | 4  |
| 1092 | BGE011078 | <i>L.c. culinaris</i> | Spain | 80 | 4 | 15 | 4 | 63 | ns | ns | ns | ns | ns | ns |
| 1093 | BGE011082 | <i>L.c. culinaris</i> | Spain | 47 | 4 | 19 | 4 | 25 | ns | ns | ns | ns | ns | ns |

|      |           |                       |       |    |   |    |   |    |    |    |    |    |    |    |
|------|-----------|-----------------------|-------|----|---|----|---|----|----|----|----|----|----|----|
| 1094 | BGE011085 | <i>L.c. culinaris</i> | Spain | 47 | 4 | 32 | 4 | 27 | ns | ns | ns | ns | ns | ns |
| 1095 | BGE011086 | <i>L.c. culinaris</i> | Spain | 60 | 4 | 28 | 4 | 37 | 4  | 23 | 4  | 25 | 4  | 2  |
| 1096 | BGE011087 | <i>L.c. culinaris</i> | Spain | 40 | 4 | 23 | 4 | 30 | ns | ns | ns | ns | ns | ns |
| 1097 | BGE011088 | <i>L.c. culinaris</i> | Spain | 15 | 4 | 20 | 4 | 50 | ns | ns | ns | ns | ns | ns |
| 1098 | BGE011089 | <i>L.c. culinaris</i> | Spain | 20 | 4 | 19 | 4 | 57 | 4  | 67 | 4  | 60 | 4  | 17 |
| 1099 | BGE011091 | <i>L.c. culinaris</i> | Spain | 55 | 4 | 28 | 4 | 37 | ns | ns | ns | ns | ns | ns |
| 1100 | BGE011092 | <i>L.c. culinaris</i> | Spain | 70 | 4 | 38 | 4 | 28 | 4  | 53 | 4  | 70 | 4  | 4  |
| 1101 | BGE011094 | <i>L.c. culinaris</i> | Spain | 37 | 4 | 45 | 4 | 32 | ns | ns | ns | ns | ns | ns |
| 1102 | BGE011095 | <i>L.c. culinaris</i> | Spain | 63 | 4 | 15 | 4 | 33 | 4  | 50 | ns | ns | ns | ns |
| 1103 | BGE011096 | <i>L.c. culinaris</i> | Spain | 50 | 4 | 33 | 4 | 37 | 4  | 50 | ns | ns | ns | ns |
| 1104 | BGE011085 | <i>L.c. culinaris</i> | Spain | 60 | 4 | 29 | 4 | 20 | 4  | 28 | ns | ns | ns | ns |
| 1105 | BGE014000 | <i>L.c. culinaris</i> | Spain | 60 | 4 | 30 | 4 | 60 | 4  | 50 | ns | ns | ns | ns |
| 1106 | BGE016344 | <i>L.c. culinaris</i> | Spain | 60 | 4 | 24 | 4 | 47 | 4  | 18 | ns | ns | ns | ns |
| 1107 | BGE016345 | <i>L.c. culinaris</i> | Spain | 63 | 4 | 40 | 4 | 57 | 4  | 30 | ns | ns | ns | ns |
| 1108 | BGE016346 | <i>L.c. culinaris</i> | Spain | 67 | 4 | 33 | 4 | 43 | 4  | 28 | ns | ns | ns | ns |
| 1109 | BGE016348 | <i>L.c. culinaris</i> | Spain | 53 | 4 | 47 | 4 | 43 | 4  | 30 | 4  | 67 | 4  | 17 |
| 1110 | BGE016350 | <i>L.c. culinaris</i> | Spain | 37 | 4 | 14 | 4 | 57 | 4  | 37 | 4  | 43 | ns | ns |
| 1111 | BGE016352 | <i>L.c. culinaris</i> | Spain | 60 | 4 | 33 | 4 | 50 | 4  | 32 | 4  | 20 | 4  | 10 |
| 1112 | BGE016355 | <i>L.c. culinaris</i> | Spain | 40 | 4 | 15 | 4 | 53 | 4  | 35 | 4  | 27 | 4  | 13 |
| 1113 | BGE016356 | <i>L.c. culinaris</i> | Spain | 57 | 4 | 30 | 4 | 43 | 4  | 43 | ns | ns | ns | ns |
| 1114 | BGE016357 | <i>L.c. culinaris</i> | Spain | 50 | 4 | 30 | 4 | 60 | ns | ns | ns | ns | ns | ns |
| 1115 | BGE016358 | <i>L.c. culinaris</i> | Spain | 50 | 4 | 30 | 4 | 50 | 4  | 63 | ns | ns | 4  | 37 |
| 1116 | BGE016359 | <i>L.c. culinaris</i> | Spain | 40 | 4 | 20 | 4 | 53 | 4  | 57 | 4  | 47 | 4  | 33 |
| 1117 | BGE016362 | <i>L.c. culinaris</i> | Spain | 83 | 4 | 25 | 4 | 50 | 4  | 70 | ns | ns | ns | ns |
| 1118 | BGE016363 | <i>L.c. culinaris</i> | Spain | 85 | 4 | 30 | 4 | 23 | 4  | 47 | ns | ns | ns | ns |
| 1119 | BGE016365 | <i>L.c. culinaris</i> | Spain | 75 | 4 | 35 | 4 | 37 | 4  | 37 | ns | ns | ns | ns |
| 1120 | BGE019696 | <i>L.c. culinaris</i> | Spain | 40 | 4 | 16 | 4 | 55 | 4  | 50 | 4  | 37 | 4  | 7  |
| 1121 | BGE019698 | <i>L.c. culinaris</i> | Spain | 63 | 4 | 28 | 4 | 40 | 4  | 60 | 4  | 43 | 4  | 12 |
| 1122 | BGE019699 | <i>L.c. culinaris</i> | Spain | 35 | 4 | 12 | 4 | 30 | ns | ns | ns | ns | ns | ns |
| 1123 | BGE019701 | <i>L.c. culinaris</i> | Spain | 50 | 4 | 21 | 4 | 27 | 4  | 27 | 4  | 38 | 4  | 1  |
| 1124 | BGE019708 | <i>L.c. culinaris</i> | Spain | 53 | 4 | 33 | 4 | 50 | 4  | 43 | 4  | 43 | 4  | 17 |
| 1125 | BGE019710 | <i>L.c. culinaris</i> | Spain | 55 | 4 | 33 | 4 | 47 | ns | ns | ns | ns | ns | ns |
| 1126 | BGE019716 | <i>L.c. culinaris</i> | Spain | 50 | 4 | 37 | 4 | 27 | 4  | 47 | ns | ns | ns | ns |
| 1127 | BGE019721 | <i>L.c. culinaris</i> | Spain | 47 | 4 | 28 | 4 | 63 | 4  | 45 | ns | ns | ns | ns |
| 1128 | BGE019729 | <i>L.c. culinaris</i> | Spain | 60 | 4 | 22 | 4 | 47 | 4  | 63 | 4  | 32 | 4  | 8  |
| 1129 | BGE022153 | <i>L.c. culinaris</i> | Spain | 35 | 4 | 10 | 4 | 57 | 4  | 47 | 4  | 53 | 4  | 27 |
| 1130 | BGE022526 | <i>L.c. culinaris</i> | Spain | 40 | 4 | 13 | 4 | 37 | 4  | 53 | 4  | 53 | 4  | 20 |
| 1131 | BGE023248 | <i>L.c. culinaris</i> | Spain | 13 | 4 | 4  | 4 | 60 | 4  | 40 | 4  | 45 | 4  | 17 |
| 1132 | BGE023249 | <i>L.c. culinaris</i> | Spain | 47 | 4 | 28 | 4 | 50 | ns | ns | ns | ns | ns | ns |

|      |           |                       |       |    |      |    |    |    |    |    |    |    |    |    |
|------|-----------|-----------------------|-------|----|------|----|----|----|----|----|----|----|----|----|
| 1133 | BGE023250 | <i>L.c. culinaris</i> | Spain | 35 | 4    | 35 | 4  | 57 | 4  | 43 | 4  | 32 | 4  | 27 |
| 1134 | BGE023655 | <i>L.c. culinaris</i> | Spain | 30 | 4    | 30 | 4  | 50 | ns | ns | ns | ns | ns | ns |
| 1135 | BGE024338 | <i>L.c. culinaris</i> | Spain | 53 | 4    | 20 | 4  | 63 | ns | ns | ns | ns | ns | ns |
| 1136 | BGE024339 | <i>L.c. culinaris</i> | Spain | 33 | 4    | 8  | 4  | 40 | ns | ns | ns | ns | ns | ns |
| 1137 | BGE025292 | <i>L.c. culinaris</i> | Spain | 1  | 4    | 7  | 4  | 30 | 4  | 38 | 4  | 32 | 4  | 8  |
| 1138 | BGE025596 | <i>L.c. culinaris</i> | Spain | 55 | 4    | 5  | 4  | 37 | 4  | 37 | 4  | 47 | ns | ns |
| 1139 | BGE025598 | <i>L.c. culinaris</i> | Spain | 40 | 4    | 19 | 4  | 30 | 4  | 22 | 4  | 32 | 4  | 17 |
| 1140 | BGE025599 | <i>L.c. culinaris</i> | Spain | 20 | 4    | 30 | 4  | 57 | 4  | 43 | 4  | 47 | 4  | 12 |
| 1141 | BGE025600 | <i>L.c. culinaris</i> | Spain | 50 | 4    | 25 | 4  | 40 | 4  | 47 | 4  | 27 | 4  | 22 |
| 1142 | BGE025602 | <i>L.c. culinaris</i> | Spain | 50 | 4    | 35 | 4  | 33 | ns | ns | ns | ns | ns | ns |
| 1143 | BGE025718 | <i>L.c. culinaris</i> | Spain | 40 | 4    | 25 | 4  | 57 | ns | ns | ns | ns | ns | ns |
| 1144 | BGE025720 | <i>L.c. culinaris</i> | Spain | 44 | 4    | 22 | 4  | 37 | 4  | 8  | 4  | 67 | 4  | 10 |
| 1145 | BGE026701 | <i>L.c. culinaris</i> | Spain | 3  | 4    | 9  | 3  | 23 | 1+ | 12 | 1  | 7  | ;  | 0  |
| 1146 | BGE027126 | <i>L.c. culinaris</i> | Spain | 50 | 4    | 38 | 4  | 37 | 4  | 27 | 4  | 63 | 4  | 18 |
| 1147 | BGE027127 | <i>L.c. culinaris</i> | Spain | 70 | 4    | 13 | 4  | 37 | 4  | 43 | 4  | 57 | ns | ns |
| 1148 | BGE029091 | <i>L.c. culinaris</i> | Spain | 45 | 4    | 18 | 4  | 47 | 4  | 30 | ns | ns | ns | ns |
| 1149 | BGE031050 | <i>L.c. culinaris</i> | Spain | 47 | 4    | 50 | 4  | 28 | 4  | 43 | ns | ns | ns | ns |
| 1150 | BGE031051 | <i>L.c. culinaris</i> | Spain | 43 | 4    | 38 | 4  | 37 | 4  | 33 | ns | ns | ns | ns |
| 1151 | BGE031052 | <i>L.c. culinaris</i> | Spain | 40 | 4    | 17 | 4  | 30 | 4  | 57 | ns | ns | ns | ns |
| 1152 | BGE031054 | <i>L.c. culinaris</i> | Spain | 65 | 4    | 37 | 4  | 40 | 4  | 67 | ns | ns | ns | ns |
| 1153 | BGE031055 | <i>L.c. culinaris</i> | Spain | 60 | ns   | ns | 4  | 37 | 4  | 50 | ns | ns | ns | ns |
| 1154 | BGE031056 | <i>L.c. culinaris</i> | Spain | 30 | 4    | 30 | 4  | 40 | ns | ns | ns | ns | ns | ns |
| 1155 | BGE031059 | <i>L.c. culinaris</i> | Spain | 40 | 4    | 40 | 4  | 43 | ns | ns | ns | ns | ns | ns |
| 1156 | BGE031058 | <i>L.c. culinaris</i> | Spain | 53 | 4    | 30 | 4  | 47 | 4  | 27 | 4  | 35 | 4  | 10 |
| 1157 | BGE031060 | <i>L.c. culinaris</i> | Spain | 80 | 4    | 32 | 4  | 43 | 4  | 32 | 4  | 23 | 4  | 1  |
| 1158 | BGE031061 | <i>L.c. culinaris</i> | Spain | 50 | 4    | 43 | 4  | 47 | 4  | 27 | 4  | 17 | 4  | 20 |
| 1159 | BGE031062 | <i>L.c. culinaris</i> | Spain | 60 | 4    | 30 | 4  | 60 | ns | ns | ns | ns | ns | ns |
| 1160 | BGE031063 | <i>L.c. culinaris</i> | Spain | 67 | 4    | 35 | 4  | 57 | 4  | 57 | 4  | 53 | 4  | 12 |
| 1161 | BGE031064 | <i>L.c. culinaris</i> | Spain | 55 | 4    | 25 | 4  | 50 | 4  | 67 | 4  | 63 | ns | ns |
| 1162 | BGE031065 | <i>L.c. culinaris</i> | Spain | 45 | 4    | 20 | 4  | 45 | 4  | 48 | 4  | 60 | ns | ns |
| 1163 | BGE031068 | <i>L.c. culinaris</i> | Spain | 30 | 4    | 23 | 4  | 37 | 4  | 60 | 4  | 63 | ns | ns |
| 1164 | BGE031069 | <i>L.c. culinaris</i> | Spain | 50 | 4    | 35 | 4  | 33 | 4  | 40 | 4  | 18 | ns | ns |
| 1165 | BGE031070 | <i>L.c. culinaris</i> | Spain | 53 | 4    | 27 | 4  | 40 | 4  | 17 | 4  | 23 | 2  | 4  |
| 1166 | BGE032283 | <i>L.c. culinaris</i> | Spain | 23 | 4    | 19 | 4  | 37 | 4  | 40 | 4  | 42 | 4  | 5  |
| 1167 | BGE032289 | <i>L.c. culinaris</i> | Spain | 65 | 4    | 45 | 4  | 37 | ns | ns | ns | ns | ns | ns |
| 1168 | BGE034194 | <i>L.c. culinaris</i> | Spain | 1  | ;(2) | 9  | 1+ | 21 | 4  | 11 | 1+ | 12 | 1  | 4  |
| 1170 | BGE001861 | <i>L.c. culinaris</i> | Spain | 40 | 4    | 35 | 4  | 63 | 4  | 60 | ns | ns | ns | ns |
| 1171 | BGE008983 | <i>L.c. culinaris</i> | Spain | 23 | 4    | 18 | 4  | 57 | 4  | 40 | ns | ns | ns | ns |

|      |           |                       |       |    |    |    |    |    |    |    |    |    |    |    |
|------|-----------|-----------------------|-------|----|----|----|----|----|----|----|----|----|----|----|
| 1172 | BGE037770 | <i>L.c. culinaris</i> | Spain | 47 | 4  | 19 | 4  | 40 | ns | ns | ns | ns | ns | ns |
| 1173 | BGE039490 | <i>L.c. culinaris</i> | Spain | 65 | 4  | 45 | 4  | 40 | ns | ns | ns | ns | ns | ns |
| 1174 | BGE039491 | <i>L.c. culinaris</i> | Spain | 50 | 4  | 40 | 4  | 43 | ns | ns | ns | ns | ns | ns |
| 1175 | BGE016347 | <i>L.c. culinaris</i> | Spain | 45 | 4  | 30 | 4  | 33 | 4  | 33 | 4  | 30 | 4  | 43 |
| 1176 | BGE016353 | <i>L.c. culinaris</i> | Spain | 47 | 4  | 35 | 4  | 43 | 4  | 37 | 4  | 18 | 4  | 43 |
| 1177 | BGE016354 | <i>L.c. culinaris</i> | Spain | 37 | 4  | 27 | 4  | 60 | 4  | 57 | 4  | 47 | 4  | 40 |
| 1178 | BGE016360 | <i>L.c. culinaris</i> | Spain | 30 | 4  | 15 | 4  | 63 | ns | ns | ns | ns | ns | ns |
| 1179 | BGE016364 | <i>L.c. culinaris</i> | Spain | 40 | 4  | 38 | 4  | 40 | ns | ns | ns | ns | ns | ns |
| 1180 | BGE019700 | <i>L.c. culinaris</i> | Spain | 50 | 4  | 37 | 4  | 37 | 4  | 40 | 4  | 50 | 4  | 23 |
| 1181 | BGE025719 | <i>L.c. culinaris</i> | Spain | 30 | 4  | 20 | 4  | 43 | 4  | 57 | ns | ns | ns | ns |
| 1182 | BGE029684 | <i>L.c. culinaris</i> | Spain | 30 | 4  | 14 | 4  | 37 | ns | ns | ns | ns | ns | ns |
| 1183 | BGE029685 | <i>L.c. culinaris</i> | Spain | 23 | 4  | 50 | 4  | 47 | 4  | 47 | ns | ns | ns | ns |
| 1184 | BGE031048 | <i>L.c. culinaris</i> | Spain | 3  | 4  | 7  | 4  | 47 | 4  | 27 | ns | ns | ns | ns |
| 1185 | BGE032284 | <i>L.c. culinaris</i> | Spain | 57 | 4  | 30 | 4  | 70 | 4  | 43 | 4  | 77 | 4  | 17 |
| 1186 | BGE032290 | <i>L.c. culinaris</i> | Spain | 50 | 4  | 33 | 4  | 70 | 4  | 50 | 4  | 73 | 4  | 37 |
| 1187 | BGE034195 | <i>L.c. culinaris</i> | Spain | 50 | 4  | 40 | 4  | 43 | ns | ns | ns | ns | ns | ns |
| 1188 | BGE034196 | <i>L.c. culinaris</i> | Spain | 20 | 4  | 22 | 4  | 43 | ns | ns | ns | ns | ns | ns |
| 1189 | BGE034197 | <i>L.c. culinaris</i> | Spain | 40 | 4  | 30 | 4  | 28 | ns | ns | ns | ns | ns | ns |
| 1190 | BGE034413 | <i>L.c. culinaris</i> | Spain | 70 | 4  | 45 | 4  | 42 | 4  | 42 | 4  | 25 | 4  | 7  |
| 1191 | BGE040543 | <i>L.c. culinaris</i> | Spain | 60 | 4  | 38 | 4  | 33 | 4  | 30 | 4  | 33 | 4  | 8  |
| 1192 | BGE040544 | <i>L.c. culinaris</i> | Spain | 30 | 4  | 28 | 4  | 37 | 4  | 40 | 4  | 35 | 4  | 4  |
| 1193 | BGE040545 | <i>L.c. culinaris</i> | Spain | 47 | 4  | 20 | 4  | 33 | 4  | 25 | 4  | 15 | 4  | 5  |
| 1194 | BGE040546 | <i>L.c. culinaris</i> | Spain | 43 | 4  | 10 | 4  | 20 | 4  | 15 | 4  | 20 | 4  | 2  |
| 1195 | BGE040547 | <i>L.c. culinaris</i> | Spain | 40 | 4  | 4  | 4  | 25 | 4  | 40 | 4  | 22 | 4  | 13 |
| 1196 | BGE040548 | <i>L.c. culinaris</i> | Spain | 50 | 4  | 33 | 4  | 25 | 4  | 30 | 4  | 33 | 4  | 17 |
| 1197 | BGE040549 | <i>L.c. culinaris</i> | Spain | 35 | 4  | 38 | 4  | 30 | 4  | 47 | 4  | 25 | 4  | 13 |
| 1283 | BGE001882 | <i>L.c. culinaris</i> | Spain | 80 | 4  | 27 | ns | ns | ns | ns | 4  | 50 | 4  | 23 |
| 1284 | BGE001885 | <i>L.c. culinaris</i> | Spain | 60 | 4  | 25 | ns | ns | ns | ns | 4  | 40 | 4  | 20 |
| 1285 | BGE001892 | <i>L.c. culinaris</i> | Spain | 67 | 4  | 40 | ns | ns | ns | ns | 4  | 57 | 4  | 30 |
| 1286 | BGE016366 | <i>L.c. culinaris</i> | Spain | 35 | 4  | 20 | ns | ns | ns | ns | 4  | 60 | ns | ns |
| 1288 | BGE019580 | <i>L.c. culinaris</i> |       | 30 | ns | ns | 4  | 24 | 3  | 9  | 2- | 5  | 4  | 5  |
| 1289 | BGE019582 | <i>L.c. culinaris</i> |       | 57 | 4  | 38 | ns | ns | ns | ns | 4  | 35 | 4  | 5  |
| 1292 | BGE024343 | <i>L.c. culinaris</i> | Spain | 57 | 4  | 11 | 4  | 45 | ns | ns | 4  | 50 | 4  | 7  |
| 1293 | BGE024693 | <i>L.c. culinaris</i> | Spain | 77 | 4  | 45 | ns | ns | ns | ns | 4  | 70 | ns | ns |
| 1294 | BGE029092 | <i>L.c. culinaris</i> | Spain | 60 | 4  | 33 | 4  | 15 | ns | ns | 4  | 17 | 4  | 2  |
| 1295 | BGE031066 | <i>L.c. culinaris</i> | Spain | 30 | ns | ns | ns | ns | ns | ns | 4  | 40 | 4  | 10 |
| 1296 | BGE031067 | <i>L.c. culinaris</i> | Spain | 50 | 4  | 27 | ns | ns | ns | ns | 4  | 63 | 4  | 7  |
| 1297 | BGE032286 | <i>L.c. culinaris</i> | Spain | 40 | 4  | 37 | ns | ns | ns | ns | 4  | 50 | 4  | 23 |

|      |           |                       |       |    |    |    |   |    |    |    |    |    |    |    |
|------|-----------|-----------------------|-------|----|----|----|---|----|----|----|----|----|----|----|
| 1298 | BGE032290 | <i>L.c. culinaris</i> | Spain | 57 | 4  | 45 | 4 | 43 | ns | ns | 4  | 33 | ns | ns |
| 1299 | BGE132291 | <i>L.c. culinaris</i> | Spain | 60 | 4  | 40 | 4 | 20 | ns | ns | 4  | 40 | ns | ns |
| 1300 | BGE034196 | <i>L.c. culinaris</i> | Spain | 10 | ns | ns | 4 | 18 | 4  | 4  | 4  | 8  | ns | ns |
| 1322 | W6 27754  | <i>L.c. culinaris</i> | USA   | ns | 4  | 40 | 4 | 48 | 4  | 48 | 4  | 30 | 4  | 45 |
| 1323 | W6 27756  | <i>L.c. culinaris</i> | USA   | ns | ns | ns | 4 | 42 | 4  | 27 | 4  | 40 | 4  | 38 |
| 1324 | W6 27757  | <i>L.c. culinaris</i> | USA   | ns | ns | ns | 3 | 43 | 3  | 29 | 4  | 70 | 1  | 15 |
| 1325 | W6 27758  | <i>L.c. culinaris</i> | USA   | ns | ns | ns | 4 | 42 | 4  | 40 | 4  | 50 | 4  | 50 |
| 1326 | W6 27759  | <i>L.c. culinaris</i> | USA   | ns | ns | ns | 4 | 50 | 4  | 37 | 4  | 60 | 4  | 50 |
| 1327 | W6 27760  | <i>L.c. culinaris</i> | USA   | ns | ns | ns | 4 | 53 | 4  | 30 | 4  | 40 | 4  | 50 |
| 1328 | W6 27762  | <i>L.c. culinaris</i> | USA   | ns | ns | ns | 4 | 45 | 4  | 37 | 4  | 50 | 4  | 55 |
| 1329 | W6 27763  | <i>L.c. culinaris</i> | USA   | ns | ns | ns | 4 | 47 | 4  | 40 | 4  | 40 | 4  | 45 |
| 1330 | W6 27764  | <i>L.c. culinaris</i> | USA   | ns | ns | ns | 4 | 33 | 4  | 32 | 4  | 30 | 4  | 28 |
| 1331 | W6 27765  | <i>L.c. culinaris</i> | USA   | ns | ns | ns | 3 | 28 | 4  | 37 | 4  | 50 | 2  | 25 |
| 1332 | W6 27766  | <i>L.c. culinaris</i> | USA   | ns | ns | ns | 4 | 55 | 4  | 38 | 4  | 70 | 4  | 45 |
| 1333 | W6 27767  | <i>L.c. culinaris</i> | USA   | ns | ns | ns | 4 | 42 | 4  | 43 | 4  | 40 | 4  | 35 |
| 1334 | W6 27780  | <i>L.c. culinaris</i> | USA   | ns | ns | ns | 4 | 43 | 4  | 48 | 4  | 50 | 4  | 45 |
| 1335 | W6 27781  | <i>L.c. culinaris</i> | USA   | ns | ns | ns | 4 | 52 | 4  | 42 | 4  | 60 | 4  | 50 |
| 1336 | W6 27782  | <i>L.c. culinaris</i> | USA   | ns | ns | ns | 4 | 52 | 4  | 48 | 4  | 70 | 4  | 45 |
| 1338 | PI169534  | <i>L.c. culinaris</i> | USA   | ns | 4  | 25 | 4 | 45 | 4  | 28 | 4  | 50 | 4  | 40 |
| 1339 | PI175754  | <i>L.c. culinaris</i> | USA   | ns | 4  | 30 | 4 | 57 | 4  | 43 | 4  | 60 | 4  | 40 |
| 1340 | PI177430  | <i>L.c. culinaris</i> | USA   | ns | 4  | 30 | 4 | 57 | 4  | 43 | 4  | 60 | 4  | 50 |
| 1341 | PI178939  | <i>L.c. culinaris</i> | USA   | ns | 4  | 3  | 4 | 23 | 4  | 27 | 4  | 40 | 4  | 35 |
| 1342 | PI178940  | <i>L.c. culinaris</i> | USA   | ns | 4  | 20 | 4 | 47 | 4  | 45 | 4  | 50 | 4  | 43 |
| 1343 | PI178971  | <i>L.c. culinaris</i> | USA   | ns | 4  | 40 | 4 | 43 | 4  | 40 | 4  | 50 | 4  | 33 |
| 1344 | PI179324  | <i>L.c. culinaris</i> | USA   | ns | 4  | 27 | 4 | 43 | 4  | 30 | 4  | 40 | 4  | 45 |
| 1345 | PI181771  | <i>L.c. culinaris</i> | USA   | ns | 4  | 40 | 4 | 36 | 4  | 43 | 4  | 50 | 4  | 40 |
| 1346 | PI182217  | <i>L.c. culinaris</i> | USA   | ns | 4  | 40 | 4 | 43 | 4  | 45 | 4  | 60 | 4  | 30 |
| 1347 | PI193547  | <i>L.c. culinaris</i> | USA   | ns | 4  | 25 | 4 | 33 | 4  | 37 | 4  | 50 | 4  | 48 |
| 1348 | PI193548  | <i>L.c. culinaris</i> | USA   | ns | 4  | 55 | 4 | 47 | 4  | 35 | 4  | 50 | 4  | 45 |
| 1349 | PI193817  | <i>L.c. culinaris</i> | USA   | ns | 4  | 40 | 4 | 33 | 4  | 33 | 4  | 40 | 4  | 20 |
| 1350 | PI207492  | <i>L.c. culinaris</i> | USA   | ns | 4  | 18 | 4 | 37 | 4  | 33 | 4  | 40 | 4  | 30 |
| 1351 | PI209858  | <i>L.c. culinaris</i> | USA   | ns | 4  | 1  | 4 | 45 | 4  | 25 | 4  | 60 | ;  | 0  |
| 1352 | PI211052  | <i>L.c. culinaris</i> | USA   | ns | 4  | 45 | 4 | 35 | 4  | 42 | 4  | 40 | 4  | 28 |
| 1353 | PI211602  | <i>L.c. culinaris</i> | USA   | ns | 4  | 25 | 4 | 47 | 4  | 48 | 4  | 60 | 4  | 30 |
| 1354 | PI212100  | <i>L.c. culinaris</i> | USA   | ns | 4  | 28 | 4 | 43 | 4  | 30 | 4  | 40 | 4  | 35 |
| 1355 | PI212610  | <i>L.c. culinaris</i> | USA   | ns | 4  | 35 | 4 | 40 | 4  | 35 | 3  | 25 | 4  | 40 |
| 1356 | PI217949  | <i>L.c. culinaris</i> | USA   | ns | 4  | 25 | 4 | 23 | 4  | 13 | ns | ns | 4  | 50 |
| 1358 | PI238758  | <i>L.c. culinaris</i> | USA   | ns | 4  | 30 | 4 | 48 | 4  | 48 | 4  | 50 | 4  | 50 |

|      |          |                       |     |    |    |    |   |    |   |    |   |    |    |    |
|------|----------|-----------------------|-----|----|----|----|---|----|---|----|---|----|----|----|
| 1359 | PI250156 | <i>L.c. culinaris</i> | USA | ns | 4  | 40 | 4 | 37 | 4 | 33 | 4 | 40 | 4  | 43 |
| 1360 | PI250158 | <i>L.c. culinaris</i> | USA | ns | 4  | 3  | 4 | 30 | 4 | 33 | 4 | 40 | 4  | 38 |
| 1361 | PI251032 | <i>L.c. culinaris</i> | USA | ns | 4  | 6  | 3 | 22 | 3 | 13 | 4 | 50 | 1+ | 18 |
| 1362 | PI251248 | <i>L.c. culinaris</i> | USA | ns | ns | ns | 4 | 38 | 4 | 28 | 4 | 40 | 4  | 45 |
| 1366 | PI273664 | <i>L.c. culinaris</i> | USA | ns | 4  | 40 | 4 | 47 | 4 | 43 | 4 | 40 | 4  | 35 |
| 1367 | PI283604 | <i>L.c. culinaris</i> | USA | ns | 4  | 20 | 4 | 60 | 4 | 55 | 4 | 40 | 4  | 53 |
| 1368 | PI289070 | <i>L.c. culinaris</i> | USA | ns | 4  | 25 | 4 | 73 | 4 | 55 | 4 | 40 | 4  | 50 |
| 1369 | PI289073 | <i>L.c. culinaris</i> | USA | ns | 4  | 19 | 4 | 53 | 4 | 37 | 4 | 50 | 4  | 45 |
| 1370 | PI289079 | <i>L.c. culinaris</i> | USA | ns | 4  | 8  | 4 | 43 | 4 | 32 | 4 | 40 | 4  | 35 |
| 1371 | PI290716 | <i>L.c. culinaris</i> | USA | ns | 4  | 17 | 4 | 27 | 4 | 32 | 3 | 20 | 4  | 30 |
| 1372 | PI297284 | <i>L.c. culinaris</i> | USA | ns | 4  | 15 | 4 | 43 | 4 | 40 | 4 | 45 | 4  | 50 |
| 1373 | PI297285 | <i>L.c. culinaris</i> | USA | ns | 4  | 15 | 4 | 50 | 4 | 38 | 4 | 50 | 4  | 48 |
| 1374 | PI297287 | <i>L.c. culinaris</i> | USA | ns | 4  | 5  | 4 | 55 | 4 | 45 | 4 | 50 | 4  | 25 |
| 1375 | PI297754 | <i>L.c. culinaris</i> | USA | ns | 4  | 19 | 4 | 43 | 4 | 38 | 4 | 50 | 4  | 55 |
| 1376 | PI297772 | <i>L.c. culinaris</i> | USA | ns | 4  | 21 | 4 | 47 | 4 | 37 | 4 | 40 | 4  | 45 |
| 1377 | PI297787 | <i>L.c. culinaris</i> | USA | ns | 4  | 20 | 4 | 40 | 4 | 25 | 4 | 40 | 4  | 30 |
| 1378 | PI298023 | <i>L.c. culinaris</i> | USA | ns | 4  | 48 | 4 | 60 | 4 | 40 | 4 | 45 | 4  | 25 |
| 1379 | PI298121 | <i>L.c. culinaris</i> | USA | ns | 4  | 25 | 4 | 48 | 4 | 27 | 4 | 25 | 4  | 35 |
| 1380 | PI298122 | <i>L.c. culinaris</i> | USA | ns | 4  | 24 | 4 | 43 | 4 | 38 | 4 | 20 | 4  | 40 |
| 1381 | PI298357 | <i>L.c. culinaris</i> | USA | ns | 4  | 35 | 4 | 53 | 4 | 42 | 4 | 45 | 4  | 30 |
| 1382 | PI298631 | <i>L.c. culinaris</i> | USA | ns | ns | ns | 4 | 47 | 4 | 65 | 4 | 50 | 4  | 45 |
| 1383 | PI298644 | <i>L.c. culinaris</i> | USA | ns | 4  | 45 | 4 | 53 | 4 | 52 | 4 | 45 | 4  | 10 |
| 1384 | PI298922 | <i>L.c. culinaris</i> | USA | ns | 4  | 5  | 4 | 52 | 4 | 33 | 4 | 45 | 4  | 40 |
| 1385 | PI298923 | <i>L.c. culinaris</i> | USA | ns | 4  | 50 | 4 | 57 | 4 | 33 | 4 | 35 | 4  | 45 |
| 1386 | PI299116 | <i>L.c. culinaris</i> | USA | ns | 4  | 38 | 4 | 43 | 4 | 37 | 4 | 40 | 4  | 48 |
| 1387 | PI299120 | <i>L.c. culinaris</i> | USA | ns | 4  | 12 | 4 | 63 | 4 | 50 | 4 | 40 | 4  | 45 |
| 1388 | PI299121 | <i>L.c. culinaris</i> | USA | ns | 4  | 27 | 4 | 55 | 4 | 45 | 4 | 50 | 4  | 50 |
| 1389 | PI299126 | <i>L.c. culinaris</i> | USA | ns | ns | ns | 4 | 52 | 4 | 48 | 4 | 50 | 4  | 50 |
| 1391 | PI299164 | <i>L.c. culinaris</i> | USA | ns | 4  | 20 | 4 | 43 | 4 | 40 | 4 | 40 | 4  | 65 |
| 1392 | PI299177 | <i>L.c. culinaris</i> | USA | ns | 4  | 8  | 4 | 43 | 4 | 37 | 4 | 50 | 4  | 45 |
| 1394 | PI299215 | <i>L.c. culinaris</i> | USA | ns | 4  | 25 | 4 | 35 | 4 | 45 | 4 | 50 | 4  | 48 |
| 1395 | PI299237 | <i>L.c. culinaris</i> | USA | ns | 4  | 33 | 4 | 38 | 4 | 42 | 4 | 60 | 4  | 40 |
| 1398 | PI299351 | <i>L.c. culinaris</i> | USA | ns | 4  | 22 | 4 | 57 | 4 | 37 | 4 | 30 | 4  | 30 |
| 1400 | PI299366 | <i>L.c. culinaris</i> | USA | ns | 4  | 33 | 4 | 47 | 4 | 33 | 4 | 50 | 4  | 53 |
| 1401 | PI299371 | <i>L.c. culinaris</i> | USA | ns | 4  | 38 | 4 | 52 | 4 | 40 | 4 | 60 | 4  | 50 |
| 1403 | PI300250 | <i>L.c. culinaris</i> | USA | ns | 4  | 14 | 4 | 37 | 4 | 35 | 4 | 40 | 4  | 40 |
| 1404 | PI302398 | <i>L.c. culinaris</i> | USA | ns | ns | ns | 4 | 42 | 4 | 38 | 4 | 40 | 4  | 45 |
| 1405 | PI308614 | <i>L.c. culinaris</i> | USA | ns | 4  | 8  | 4 | 42 | 4 | 43 | 4 | 40 | 4  | 25 |
| 1406 | PI311107 | <i>L.c. culinaris</i> | USA | ns | 4  | 33 | 4 | 50 | 4 | 60 | 4 | 50 | 4  | 40 |



|      |          |                       |     |    |    |    |    |    |   |    |    |    |    |    |
|------|----------|-----------------------|-----|----|----|----|----|----|---|----|----|----|----|----|
| 1407 | PI312175 | <i>L.c. culinaris</i> | USA | ns | 4  | 35 | 4  | 35 | 4 | 40 | 4  | 40 | 4  | 40 |
| 1408 | PI320935 | <i>L.c. culinaris</i> | USA | ns | 4  | 33 | 4  | 43 | 4 | 28 | ns | ns | 4  | 40 |
| 1409 | PI320936 | <i>L.c. culinaris</i> | USA | ns | 4  | 10 | 4  | 43 | 4 | 19 | 4  | 15 | 4  | 35 |
| 1410 | PI320937 | <i>L.c. culinaris</i> | USA | ns | 4  | 15 | 4  | 40 | 4 | 40 | ns | ns | 4  | 45 |
| 1411 | PI320940 | <i>L.c. culinaris</i> | USA | ns | 4  | 6  | 4  | 58 | 4 | 55 | 4  | 60 | 4  | 45 |
| 1412 | PI320941 | <i>L.c. culinaris</i> | USA | ns | 4  | 42 | 4  | 30 | 4 | 38 | 4  | 40 | 4  | 28 |
| 1413 | PI320944 | <i>L.c. culinaris</i> | USA | ns | 4  | 30 | 2+ | 13 | 1 | 8  | 4  | 60 | 4  | 58 |
| 1414 | PI320945 | <i>L.c. culinaris</i> | USA | ns | 4  | 8  | 4  | 47 | 4 | 37 | 4  | 50 | 4  | 28 |
| 1415 | PI320946 | <i>L.c. culinaris</i> | USA | ns | 4  | 3  | 4  | 35 | 4 | 43 | 4  | 40 | 4  | 50 |
| 1416 | PI320952 | <i>L.c. culinaris</i> | USA | ns | ns | ns | 4  | 45 | 4 | 43 | 4  | 30 | 4  | 25 |
| 1417 | PI320953 | <i>L.c. culinaris</i> | USA | ns | 4  | 11 | 4  | 45 | 4 | 40 | 4  | 40 | 4  | 43 |
| 1418 | PI320954 | <i>L.c. culinaris</i> | USA | ns | 4  | 45 | 4  | 48 | 4 | 38 | 4  | 50 | 4  | 43 |
| 1419 | PI329157 | <i>L.c. culinaris</i> | USA | ns | 4  | 15 | 4  | 43 | 4 | 30 | 4  | 60 | 4  | 40 |
| 1423 | PI339283 | <i>L.c. culinaris</i> | USA | ns | 4  | 25 | 4  | 47 | 4 | 38 | 4  | 40 | 4  | 58 |
| 1424 | PI339285 | <i>L.c. culinaris</i> | USA | ns | 4  | 23 | 4  | 48 | 4 | 42 | 4  | 60 | 4  | 38 |
| 1426 | PI339292 | <i>L.c. culinaris</i> | USA | ns | 4  | 30 | 4  | 43 | 4 | 30 | 4  | 35 | 4  | 25 |
| 1427 | PI339310 | <i>L.c. culinaris</i> | USA | ns | 4  | 28 | 4  | 48 | 4 | 42 | 4  | 40 | 4  | 45 |
| 1428 | PI339318 | <i>L.c. culinaris</i> | USA | ns | 4  | 30 | 4  | 45 | 4 | 28 | 4  | 25 | 4  | 23 |
| 1429 | PI343026 | <i>L.c. culinaris</i> | USA | ns | 4  | 35 | 4  | 42 | 4 | 30 | 4  | 45 | 4  | 30 |
| 1430 | PI345627 | <i>L.c. culinaris</i> | USA | ns | 4  | 1  | 3  | 23 | 4 | 40 | 4  | 35 | 1+ | 13 |
| 1431 | PI357225 | <i>L.c. culinaris</i> | USA | ns | 4  | 6  | 4  | 42 | 4 | 32 | 4  | 45 | 4  | 45 |
| 1432 | PI358602 | <i>L.c. culinaris</i> | USA | ns | 4  | 8  | 4  | 47 | 4 | 38 | 4  | 50 | 4  | 30 |
| 1433 | PI368647 | <i>L.c. culinaris</i> | USA | ns | 4  | 2  | 4  | 40 | 4 | 42 | 4  | 35 | 4  | 40 |
| 1434 | PI368651 | <i>L.c. culinaris</i> | USA | ns | ns | ns | 4  | 50 | 4 | 38 | 4  | 45 | 4  | 38 |
| 1435 | PI370481 | <i>L.c. culinaris</i> | USA | ns | ns | ns | 4  | 48 | 4 | 32 | 4  | 70 | 4  | 58 |
| 1436 | PI374116 | <i>L.c. culinaris</i> | USA | ns | 4  | 25 | 4  | 35 | 4 | 30 | 4  | 35 | 4  | 45 |
| 1437 | PI374117 | <i>L.c. culinaris</i> | USA | ns | 4  | 27 | 3  | 35 | 4 | 35 | 4  | 70 | 3  | 23 |
| 1438 | PI374120 | <i>L.c. culinaris</i> | USA | ns | ns | ns | 4  | 42 | 4 | 43 | 4  | 25 | 4  | 30 |
| 1439 | PI379368 | <i>L.c. culinaris</i> | USA | ns | 4  | 33 | 4  | 40 | 4 | 40 | 4  | 40 | 4  | 45 |
| 1440 | PI383682 | <i>L.c. culinaris</i> | USA | ns | 4  | 35 | 4  | 47 | 4 | 48 | 4  | 40 | 4  | 38 |
| 1443 | PI420929 | <i>L.c. culinaris</i> | USA | ns | 4  | 30 | 4  | 40 | 4 | 42 | 4  | 60 | 4  | 43 |
| 1444 | PI426202 | <i>L.c. culinaris</i> | USA | ns | 4  | 35 | 4  | 38 | 4 | 37 | 4  | 30 | 4  | 38 |
| 1445 | PI426778 | <i>L.c. culinaris</i> | USA | ns | 4  | 17 | 4  | 42 | 4 | 43 | 4  | 50 | 4  | 38 |
| 1446 | PI426784 | <i>L.c. culinaris</i> | USA | ns | ns | ns | 4  | 23 | 3 | 15 | 4  | 8  | 3  | 13 |
| 1447 | PI426797 | <i>L.c. culinaris</i> | USA | ns | 4  | 1  | 4  | 35 | 4 | 35 | 4  | 30 | 4  | 43 |
| 1448 | PI426807 | <i>L.c. culinaris</i> | USA | ns | 4  | 16 | 4  | 35 | 4 | 42 | 4  | 15 | 4  | 48 |
| 1449 | PI429369 | <i>L.c. culinaris</i> | USA | ns | 4  | 9  | 4  | 40 | 4 | 42 | 4  | 40 | 4  | 40 |
| 1450 | PI429838 | <i>L.c. culinaris</i> | USA | ns | 4  | 40 | 4  | 48 | 4 | 42 | 4  | 40 | 4  | 30 |
| 1452 | PI431618 | <i>L.c. culinaris</i> | USA | ns | 4  | 12 | 4  | 53 | 4 | 47 | 4  | 40 | 4  | 38 |

|      |          |                       |     |    |    |    |   |    |   |    |    |    |   |    |
|------|----------|-----------------------|-----|----|----|----|---|----|---|----|----|----|---|----|
| 1453 | PI431622 | <i>L.c. culinaris</i> | USA | ns | 4  | 33 | 4 | 30 | 4 | 43 | 4  | 40 | 4 | 48 |
| 1454 | PI431630 | <i>L.c. culinaris</i> | USA | ns | 4  | 35 | 4 | 32 | 4 | 40 | 4  | 50 | 4 | 45 |
| 1455 | PI431631 | <i>L.c. culinaris</i> | USA | ns | 4  | 1  | 4 | 50 | 4 | 48 | 4  | 70 | 4 | 45 |
| 1456 | PI431633 | <i>L.c. culinaris</i> | USA | ns | 4  | 24 | 4 | 50 | 4 | 38 | 4  | 60 | 4 | 45 |
| 1457 | PI431636 | <i>L.c. culinaris</i> | USA | ns | 4  | 22 | 4 | 50 | 4 | 45 | 4  | 70 | 4 | 45 |
| 1458 | PI431640 | <i>L.c. culinaris</i> | USA | ns | ns | 40 | 4 | 45 | 4 | 38 | 4  | 50 | 4 | 48 |
| 1459 | PI431642 | <i>L.c. culinaris</i> | USA | ns | 4  | 30 | 4 | 50 | 4 | 38 | 3  | 30 | 4 | 45 |
| 1460 | PI431643 | <i>L.c. culinaris</i> | USA | ns | 4  | 40 | 3 | 33 | 4 | 22 | 4  | 50 | 4 | 50 |
| 1461 | PI431656 | <i>L.c. culinaris</i> | USA | ns | 4  | 35 | 4 | 50 | 4 | 43 | 4  | 50 | 4 | 45 |
| 1462 | PI431662 | <i>L.c. culinaris</i> | USA | ns | 4  | 45 | 4 | 40 | 4 | 43 | 4  | 40 | 4 | 40 |
| 1463 | PI431663 | <i>L.c. culinaris</i> | USA | ns | 4  | 40 | 4 | 42 | 4 | 43 | 4  | 60 | 4 | 40 |
| 1464 | PI431666 | <i>L.c. culinaris</i> | USA | ns | 4  | 33 | 4 | 40 | 4 | 48 | 4  | 40 | 4 | 38 |
| 1465 | PI431675 | <i>L.c. culinaris</i> | USA | ns | 4  | 38 | 4 | 40 | 4 | 47 | 4  | 40 | 4 | 45 |
| 1466 | PI431679 | <i>L.c. culinaris</i> | USA | ns | 4  | 30 | 4 | 50 | 4 | 37 | 4  | 30 | 4 | 38 |
| 1467 | PI431684 | <i>L.c. culinaris</i> | USA | ns | 4  | 20 | 4 | 50 | 4 | 37 | 4  | 40 | 4 | 40 |
| 1468 | PI431705 | <i>L.c. culinaris</i> | USA | ns | 4  | 40 | 4 | 43 | 4 | 32 | 4  | 40 | 4 | 38 |
| 1469 | PI431710 | <i>L.c. culinaris</i> | USA | ns | 4  | 25 | 4 | 47 | 4 | 40 | 4  | 50 | 4 | 40 |
| 1470 | PI431714 | <i>L.c. culinaris</i> | USA | ns | 4  | 18 | 4 | 43 | 4 | 40 | 2+ | 30 | 4 | 40 |
| 1471 | PI431717 | <i>L.c. culinaris</i> | USA | ns | 4  | 30 | 4 | 45 | 4 | 45 | 2+ | 30 | 4 | 40 |
| 1472 | PI431728 | <i>L.c. culinaris</i> | USA | ns | 4  | 19 | 4 | 45 | 4 | 45 | 4  | 30 | 4 | 35 |
| 1473 | PI431731 | <i>L.c. culinaris</i> | USA | ns | 4  | 13 | 4 | 43 | 4 | 35 | 4  | 50 | 4 | 45 |
| 1474 | PI431739 | <i>L.c. culinaris</i> | USA | ns | 4  | 40 | 4 | 43 | 4 | 43 | 4  | 60 | 4 | 50 |
| 1475 | PI431753 | <i>L.c. culinaris</i> | USA | ns | 4  | 25 | 4 | 47 | 4 | 42 | 4  | 60 | 4 | 45 |
| 1476 | PI431756 | <i>L.c. culinaris</i> | USA | ns | 4  | 27 | 4 | 48 | 4 | 32 | 4  | 60 | 4 | 43 |
| 1477 | PI431768 | <i>L.c. culinaris</i> | USA | ns | 4  | 30 | 4 | 55 | 4 | 37 | 4  | 80 | 4 | 50 |
| 1478 | PI431774 | <i>L.c. culinaris</i> | USA | ns | 4  | 20 | 4 | 52 | 4 | 40 | 4  | 45 | 4 | 43 |
| 1479 | PI431809 | <i>L.c. culinaris</i> | USA | ns | 4  | 14 | 4 | 38 | 4 | 37 | 4  | 40 | 4 | 38 |
| 1480 | PI431810 | <i>L.c. culinaris</i> | USA | ns | 4  | 42 | 4 | 53 | 4 | 32 | 4  | 40 | 4 | 35 |
| 1481 | PI431824 | <i>L.c. culinaris</i> | USA | ns | 4  | 28 | 4 | 43 | 4 | 53 | 4  | 40 | 4 | 45 |
| 1482 | PI431863 | <i>L.c. culinaris</i> | USA | ns | ns | ns | 4 | 52 | 4 | 45 | 4  | 40 | 4 | 50 |
| 1483 | PI431873 | <i>L.c. culinaris</i> | USA | ns | 4  | 35 | 4 | 40 | 4 | 32 | 4  | 50 | 4 | 40 |
| 1484 | PI431884 | <i>L.c. culinaris</i> | USA | ns | 4  | 40 | 4 | 43 | 4 | 35 | 4  | 60 | 4 | 55 |
| 1485 | PI431888 | <i>L.c. culinaris</i> | USA | ns | 4  | 28 | 4 | 42 | 4 | 37 | 4  | 50 | 4 | 48 |
| 1486 | PI431893 | <i>L.c. culinaris</i> | USA | ns | 4  | 20 | 4 | 38 | 4 | 35 | 4  | 40 | 4 | 50 |
| 1487 | PI431923 | <i>L.c. culinaris</i> | USA | ns | 4  | 27 | 4 | 47 | 4 | 40 | 4  | 45 | 4 | 45 |
| 1488 | PI431988 | <i>L.c. culinaris</i> | USA | ns | 4  | 15 | 4 | 53 | 4 | 40 | 4  | 35 | 4 | 45 |
| 1489 | PI431987 | <i>L.c. culinaris</i> | USA | ns | 4  | 50 | 4 | 45 | 4 | 37 | 4  | 40 | 4 | 45 |

|      |          |                       |     |      |    |    |   |    |   |    |    |    |   |    |
|------|----------|-----------------------|-----|------|----|----|---|----|---|----|----|----|---|----|
| 1490 | PI432000 | <i>L.c. culinaris</i> | USA | ns   | 4  | 45 | 4 | 40 | 4 | 37 | 4  | 40 | 4 | 43 |
| 1491 | PI432001 | <i>L.c. culinaris</i> | USA | ns   | 4  | 38 | 4 | 47 | 4 | 45 | 4  | 35 | 4 | 35 |
| 1492 | PI432002 | <i>L.c. culinaris</i> | USA | ns   | 4  | 33 | 4 | 38 | 4 | 43 | 4  | 50 | 4 | 35 |
| 1493 | PI432005 | <i>L.c. culinaris</i> | USA | ns   | 4  | 40 | 4 | 57 | 4 | 55 | 4  | 50 | 4 | 50 |
| 1494 | PI432028 | <i>L.c. culinaris</i> | USA | ns   | 4  | 32 | 4 | 45 | 4 | 37 | 4  | 45 | 4 | 38 |
| 1495 | PI432033 | <i>L.c. culinaris</i> | USA | ns   | 4  | 25 | 4 | 50 | 4 | 38 | 4  | 50 | 4 | 48 |
| 1497 | PI432085 | <i>L.c. culinaris</i> | USA | ns   | 4  | 18 | 4 | 48 | 4 | 43 | 4  | 40 | 4 | 43 |
| 1498 | PI432087 | <i>L.c. culinaris</i> | USA | ns   | 4  | 20 | 4 | 40 | 4 | 38 | 4  | 40 | 4 | 30 |
| 1499 | PI432124 | <i>L.c. culinaris</i> | USA | ns   | 4  | 28 | 4 | 38 | 4 | 33 | 4  | 40 | 4 | 13 |
| 1500 | PI432145 | <i>L.c. culinaris</i> | USA | ns   | 4  | 30 | 4 | 43 | 4 | 42 | 4  | 40 | 4 | 35 |
| 1501 | PI432147 | <i>L.c. culinaris</i> | USA | ns   | 4  | 10 | 4 | 53 | 4 | 45 | 4  | 50 | 4 | 50 |
| 1502 | PI432184 | <i>L.c. culinaris</i> | USA | ns   | ns | ns | 4 | 48 | 4 | 42 | 4  | 70 | 4 | 38 |
| 1503 | PI432185 | <i>L.c. culinaris</i> | USA | ns   | 4  | 20 | 4 | 47 | 4 | 43 | 4  | 80 | 4 | 30 |
| 1508 | PI432236 | <i>L.c. culinaris</i> | USA | ns   | 4  | 30 | 4 | 28 | 4 | 35 | 4  | 35 | 4 | 33 |
| 1509 | PI432237 | <i>L.c. culinaris</i> | USA | ns   | ns | ns | 4 | 28 | 4 | 22 | 4  | 40 | 4 | 23 |
| 1510 | PI432245 | <i>L.c. culinaris</i> | USA | ns   | 4  | 50 | 4 | 40 | 4 | 30 | 4  | 60 | 4 | 40 |
| 1511 | PI432259 | <i>L.c. culinaris</i> | USA | ns   | 4  | 10 | 4 | 50 | 4 | 57 | 4  | 60 | 4 | 38 |
| 1512 | PI432271 | <i>L.c. culinaris</i> | USA | ns   | 4  | 35 | 4 | 42 | 4 | 33 | 4  | 25 | 4 | 35 |
| 1513 | PI432286 | <i>L.c. culinaris</i> | USA | ns   | 4  | 35 | 4 | 50 | 4 | 33 | 4  | 50 | 4 | 30 |
| 1514 | PI435954 | <i>L.c. culinaris</i> | USA | - ns | 4  | 18 | 4 | 63 | 4 | 47 | 4  | 50 | 4 | 40 |
| 1515 | PI451763 | <i>L.c. culinaris</i> | USA | ns   | ns | ns | 2 | 38 | 2 | 28 | 3  | 45 | 2 | 10 |
| 1516 | PI451766 | <i>L.c. culinaris</i> | USA | ns   | 4  | 14 | 4 | 47 | 4 | 43 | 4  | 45 | 4 | 43 |
| 1517 | PI458503 | <i>L.c. culinaris</i> | USA | ns   | 4  | 4  | 4 | 58 | 4 | 45 | 4  | 50 | 4 | 35 |
| 1518 | PI468899 | <i>L.c. culinaris</i> | USA | ns   | 4  | 1  | 4 | 48 | 4 | 48 | 4  | 60 | 4 | 35 |
| 1519 | PI468900 | <i>L.c. culinaris</i> | USA | ns   | 4  | 4  | 4 | 50 | 4 | 43 | 4  | 50 | 4 | 45 |
| 1520 | PI468902 | <i>L.c. culinaris</i> | USA | ns   | 4  | 20 | 4 | 38 | 4 | 38 | 4  | 50 | 4 | 48 |
| 1522 | PI472122 | <i>L.c. culinaris</i> | USA | ns   | 4  | 30 | 4 | 43 | 4 | 35 | 4  | 40 | 4 | 35 |
| 1523 | PI472136 | <i>L.c. culinaris</i> | USA | ns   | 4  | 30 | 4 | 45 | 4 | 35 | 3  | 30 | 4 | 28 |
| 1524 | PI472137 | <i>L.c. culinaris</i> | USA | ns   | ;  | 0  | 4 | 42 | 4 | 23 | 3  | 15 | 4 | 48 |
| 1525 | PI472143 | <i>L.c. culinaris</i> | USA | ns   | 4  | 15 | 4 | 38 | 4 | 40 | 4  | 50 | 4 | 38 |
| 1526 | PI472161 | <i>L.c. culinaris</i> | USA | ns   | 4  | 30 | 4 | 38 | 4 | 37 | 4  | 60 | 4 | 45 |
| 1527 | PI472175 | <i>L.c. culinaris</i> | USA | ns   | 4  | 5  | 4 | 30 | 4 | 26 | ns | ns | 4 | 28 |
| 1528 | PI472194 | <i>L.c. culinaris</i> | USA | ns   | 4  | 15 | 4 | 35 | 4 | 23 | 4  | 70 | 4 | 35 |
| 1529 | PI472200 | <i>L.c. culinaris</i> | USA | ns   | 4  | 33 | 4 | 47 | 4 | 35 | 4  | 30 | 4 | 30 |
| 1530 | PI472205 | <i>L.c. culinaris</i> | USA | ns   | 4  | 30 | 4 | 53 | 4 | 42 | 4  | 40 | 4 | 40 |
| 1531 | PI472213 | <i>L.c. culinaris</i> | USA | ns   | 4  | 40 | 4 | 40 | 4 | 35 | 4  | 50 | 4 | 40 |
| 1532 | PI472224 | <i>L.c. culinaris</i> | USA | ns   | 4  | 7  | 4 | 38 | 4 | 25 | 4  | 60 | 4 | 25 |
| 1533 | PI472274 | <i>L.c. culinaris</i> | USA | ns   | 4  | 10 | 4 | 54 | 4 | 25 | 4  | 40 | 4 | 33 |
| 1534 | PI472327 | <i>L.c. culinaris</i> | USA | ns   | 4  | 21 | 4 | 35 | 4 | 30 | 4  | 40 | 4 | 33 |

|      |          |                        |                |    |     |    |   |    |    |    |    |    |    |    |
|------|----------|------------------------|----------------|----|-----|----|---|----|----|----|----|----|----|----|
| 1535 | PI472372 | <i>L.c. culinaris</i>  | USA            | ns | 4   | 8  | 4 | 28 | 4  | 28 | 4  | 40 | 4  | 30 |
| 1536 | PI472380 | <i>L.c. culinaris</i>  | USA            | ns | 4   | 4  | 4 | 47 | 4  | 27 | 4  | 25 | 4  | 30 |
| 1537 | PI472383 | <i>L.c. culinaris</i>  | USA            | ns | 4   | 45 | 4 | 38 | 4  | 35 | 4  | 60 | 4  | 33 |
| 1538 | PI472416 | <i>L.c. culinaris</i>  | USA            | ns | 4   | 1  | 4 | 43 | 4  | 10 | 4  | 50 | 4  | 35 |
| 1539 | PI472484 | <i>L.c. culinaris</i>  | USA            | ns | 4   | 10 | 4 | 40 | 4  | 30 | 4  | 40 | 4  | 43 |
| 1540 | PI472488 | <i>L.c. culinaris</i>  | USA            | ns | 4   | 2  | 4 | 28 | 4  | 48 | 4  | 3  | 4  | 50 |
| 1541 | PI472549 | <i>L.c. culinaris</i>  | USA            | ns | 4   | 15 | 4 | 28 | 4  | 25 | 4  | 30 | 4  | 25 |
| 1542 | PI472559 | <i>L.c. culinaris</i>  | USA            | ns | 4   | 1  | 4 | 37 | 4  | 28 | 4  | 50 | 4  | 40 |
| 1543 | PI472561 | <i>L.c. culinaris</i>  | USA            | ns | 4   | 6  | 4 | 48 | 4  | 35 | 4  | 30 | 4  | 35 |
| 1544 | PI472562 | <i>L.c. culinaris</i>  | USA            | ns | 4   | 7  | 4 | 25 | 4  | 28 | 4  | 15 | 4  | 28 |
| 1545 | PI472564 | <i>L.c. culinaris</i>  | USA            | ns | 4   | 30 | 4 | 45 | 4  | 38 | 4  | 50 | 4  | 40 |
| 1546 | PI472569 | <i>L.c. culinaris</i>  | USA            | ns | 4   | 6  | 4 | 43 | 4  | 28 | 4  | 60 | 4  | 48 |
| 1547 | PI472588 | <i>L.c. culinaris</i>  | USA            | ns | 4   | 38 | 4 | 33 | 4  | 38 | 4  | 50 | 4  | 45 |
| 1548 | PI472590 | <i>L.c. culinaris</i>  | USA            | ns | 4   | 33 | 4 | 37 | 4  | 47 | 4  | 40 | 4  | 40 |
| 1549 | PI472615 | <i>L.c. culinaris</i>  | USA            | ns | 4   | 30 | 4 | 45 | 4  | 58 | 4  | 50 | 4  | 45 |
| 1550 | PI472629 | <i>L.c. culinaris</i>  | USA            | ns | 4   | 45 | 4 | 50 | 4  | 55 | 4  | 40 | 4  | 20 |
| 1552 | PI477921 | <i>L.c. culinaris</i>  | USA            | ns | ns  | ns | 3 | 37 | 4  | 15 | 4  | 20 | ;  | 0  |
| 1553 | PI486127 | <i>L.c. culinaris</i>  | USA            | ns | 4   | 2  | 3 | 40 | 4  | 35 | 4  | 50 | 2  | 10 |
| 1554 | PI486128 | <i>L.c. culinaris</i>  | USA            | ns | ns  | ns | 4 | 47 | 4  | 27 | 4  | 40 | 4  | 35 |
| 1555 | PI490288 | <i>L.c. culinaris</i>  | USA            | ns | 4   | 8  | 4 | 45 | 4  | 43 | 4  | 70 | 4  | 30 |
| 1556 | PI490289 | <i>L.c. culinaris</i>  | USA            | ns | ns  | ns | 4 | 47 | 4  | 43 | 4  | 70 | 4  | 35 |
| 1557 | PI508090 | <i>L.c. culinaris</i>  | USA            | ns | ns  | ns | 4 | 55 | 4  | 47 | 4  | 50 | 4  | 45 |
| 1558 | PI518731 | <i>L.c. culinaris</i>  | USA            | ns | 4   | 37 | 4 | 38 | 4  | 38 | 4  | 45 | 4  | 40 |
| 1559 | PI518732 | <i>L.c. culinaris</i>  | USA            | ns | 2   | 2  | 1 | 8  | 2  | 5  | 4  | 5  | ;  | 0  |
| 1560 | PI518733 | <i>L.c. culinaris</i>  | USA            | ns | 4-; | 6  | 4 | 45 | 4  | 60 | 3  | 35 | 4  | 60 |
| 1561 | PI518734 | <i>L.c. culinaris</i>  | USA            | ns | ns  | 1  | ; | 15 | 1  | 7  | ;  | 0  | ;  | 0  |
| 1563 | PI533690 | <i>L.c. culinaris</i>  | USA            | ns | 4   | 18 | 4 | 48 | 4  | 48 | 4  | 30 | 4  | 30 |
| 1564 | PI533691 | <i>L.c. culinaris</i>  | USA            | ns | 4   | 12 | 4 | 42 | 4  | 47 | 4  | 50 | 4  | 40 |
| 1565 | PI533693 | <i>L.c. culinaris</i>  | USA            | ns | 4   | 8  | 4 | 57 | 4  | 50 | 4  | 70 | 4  | 45 |
| 1307 | ILWL39   | <i>L.c. odemensis</i>  | Syria          | 12 | 4   | 8  | 4 | 30 | 4  | 18 | 4  | 15 | 4  | 1  |
| 1314 | ILWL 237 | <i>L.c. odemensis</i>  | Syria          | 30 | 4   | 9  | 4 | 40 | 4  | 8  | 4  | 6  | 4  | 1  |
| 1317 | ILWL 261 | <i>L.c. odemensis</i>  | Syria          | 28 | 4   | 1  | 4 | 23 | 4  | 9  | 4  | 21 | 3  | 1  |
| 1638 | PI615677 | <i>L.c. odemensis</i>  | Turkey         | ns | ns  | ns | 4 | 30 | 4  | 20 | ns | ns | 3  | 15 |
| 1640 | PI572361 | <i>L.c. odemensis</i>  | Israel         | ns | ns  | ns | 4 | 35 | 4  | 33 | 4  | 40 | 4  | 28 |
| 1641 | PI572362 | <i>L.c. odemensis</i>  |                | ns | 4   | 5  | 4 | 33 | 4  | 20 | 4  | 30 | ns | ns |
| 1608 | PI572367 | <i>L.c. orientalis</i> | Turkey         | ns | ns  | ns | 4 | 45 | ns | ns | ns | ns | ns | ns |
| 1609 | PI572369 | <i>L.c. orientalis</i> | Czech Republic | ns | 4   | 30 | 4 | 40 | 4  | 30 | ns | ns | 4  | 35 |
| 1610 | PI572370 | <i>L.c. orientalis</i> | Uzbekistan     | ns | ns  | ns | 4 | 43 | 4  | 25 | 4  | 30 | 4  | 40 |

|      |           |                        |            |    |    |    |    |    |    |    |    |    |    |    |
|------|-----------|------------------------|------------|----|----|----|----|----|----|----|----|----|----|----|
| 1613 | PI572374  | <i>L.c. orientalis</i> | Iran       | ns | 4  | 4  | 4  | 45 | 4  | 33 | 4  | 40 | 4  | 50 |
| 1614 | PI572375  | <i>L.c. orientalis</i> | Israel     | ns | 4  | 2  | 4  | 28 | 4  | 25 | ns | ns | ns | ns |
| 1615 | PI572376  | <i>L.c. orientalis</i> | Turkey     | ns | ns | ns | 4  | 30 | 4  | 20 | ns | ns | ns | ns |
| 1616 | PI572379  | <i>L.c. orientalis</i> | Turkey     | ns | ns | ns | 4  | 20 | 4  | 35 | 4  | 50 | 4  | 30 |
| 1617 | PI572380  | <i>L.c. orientalis</i> | Iran       | ns | 4  | 10 | 4  | 25 | 4  | 23 | 4  | 35 | 4  | 10 |
| 1618 | PI572384  | <i>L.c. orientalis</i> | Turkey     | ns | 4  | 1  | 4  | 40 | 4  | 43 | 4  | 25 | 4  | 10 |
| 1619 | PI572385  | <i>L.c. orientalis</i> | Turkey     | ns | 4  | 1  | 4  | 35 | 4  | 38 | 4  | 15 | 4  | 35 |
| 1620 | PI572386  | <i>L.c. orientalis</i> | Turkey     | ns | 4  | 10 | 4  | 38 | 4  | 20 | 4  | 35 | 4  | 23 |
| 1621 | PI572389  | <i>L.c. orientalis</i> | Turkey     | ns | ns | ns | 4  | 50 | 4  | 33 | ns | ns | 4  | 23 |
| 1622 | PI572390  | <i>L.c. orientalis</i> | Turkey     | ns | 4  | 30 | 4  | 38 | 4  | 38 | 4  | 60 | 4  | 28 |
| 1623 | PI572391  | <i>L.c. orientalis</i> | Cyprus     | ns | ns | ns | 4  | 60 | 4  | 15 | ns | ns | 4  | 38 |
| 1624 | PI572392  | <i>L.c. orientalis</i> | Turkey     | ns | 4  | 40 | 4  | 33 | 4  | 37 | 4  | 25 | 4  | 40 |
| 1625 | PI572393  | <i>L.c. orientalis</i> | Turkey     | ns | 4  | 40 | 4  | 20 | 4  | 28 | ns | ns | 4  | 33 |
| 1626 | PI572396  | <i>L.c. orientalis</i> | Turkey     | ns | ns | ns | ns | ns | ;  | 0  | ns | ns | ns | ns |
| 1627 | PI572397  | <i>L.c. orientalis</i> | Turkey     | ns | 4  | 15 | ns | ns | 4  | 15 | ns | ns | ns | ns |
| 1628 | PI572398  | <i>L.c. orientalis</i> | Turkey     | ns | ns | ns | 4  | 28 | 4  | 43 | 4  | 40 | 4  | 15 |
| 1631 | PI572406  | <i>L.c. orientalis</i> | Turkey     | ns | ns | 0  | 4  | 28 | 4  | 15 | 4  | 50 | 4  | 20 |
| 1632 | PI612249  | <i>L.c. orientalis</i> | Turkey     | ns | 4  | 5  | 2+ | 10 | 4  | 17 | 2  | 5  | 4  | 10 |
| 1633 | PI615668  | <i>L.c. orientalis</i> | Turkey     | ns | 4  | 15 | 4  | 47 | 4  | 42 | 4  | 40 | 4  | 40 |
| 1636 | PI615671  | <i>L.c. orientalis</i> | Tajikistan | ns | 4  | 10 | 4  | 35 | ns | ns | ns | ns | 4  | 15 |
| 1637 | PI615672  | <i>L.c. orientalis</i> | Tajikistan | ns | 4  | 15 | 4  | 30 | 4  | 20 | ns | ns | 4  | 3  |
| 1645 | BCU001416 | <i>L.c. orientalis</i> | Israel     | ns | 4  | 30 | 4  | 23 | 4  | 23 | 4  | 70 | 4  | 40 |
| 1646 | BCU001417 | <i>L.c. orientalis</i> | Israel     | ns | 4  | 18 | 4  | 25 | 4  | 45 | 4  | 60 | 3  | 10 |
| 1647 | BCU001418 | <i>L.c. orientalis</i> | Israel     | ns | ns | ns | 4  | 38 | 4  | 30 | 4  | 50 | 4  | 27 |
| 1648 | BCU001419 | <i>L.c. orientalis</i> | Israel     | ns | 4  | 10 | 4  | 35 | 4  | 30 | 4  | 50 | 4  | 35 |
| 1649 | BCU001420 | <i>L.c. orientalis</i> | Russia     | ns | 4  | 1  | 4  | 60 | 4  | 25 | 4  | 30 | ns | ns |
| 1650 | BCU001421 | <i>L.c. orientalis</i> | Cyprus     | ns | ns | ns | 4  | 38 | 4  | 30 | 4  | 40 | 4  | 40 |
| 1651 | BCU001422 | <i>L.c. orientalis</i> | Israel     | ns | 4  | 20 | 4  | 40 | 4  | 23 | 4  | 60 | 4  | 50 |
| 1652 | BCU001423 | <i>L.c. orientalis</i> | Turkey     | ns | 4  | 40 | 4  | 30 | 4  | 30 | 4  | 50 | 4  | 25 |
| 1308 | ILWL40    | <i>L. ervoides</i>     | Syria      | 0  | ;  | 1  | 1+ | 6  | 1  | 3  | 2  | 3  | ;  | 0  |
| 1312 | ILWL 153  | <i>L. ervoides</i>     |            | 10 | ns | ns | 4  | 30 | 4  | 10 | 4  | 30 | 4  | 8  |
| 1315 | ILWL 251  | <i>L. ervoides</i>     | Syria      | 2  | 4  | 2  | 4  | 33 | 4  | 10 | 4  | 30 | 4  | 1  |
| 1318 | ILWL 271  | <i>L. ervoides</i>     | Turkey     | 10 | 4  | 1  | ns | ns | 4  | 10 | 4  | 47 | ;  | 0  |
| 1319 | ILWL 299  | <i>L. ervoides</i>     | Syria      | 20 | ns | 0  | 4  | 33 | 4  | 1  | 4  | 10 | 4  | 1  |
| 1571 | PI572316  | <i>L. ervoides</i>     | Russia     | ns | ns | ns | ;  | 0  | 1  | 5  | ns | ns | ns | ns |
| 1572 | PI572317  | <i>L. ervoides</i>     | Italy      | ns | 4  | 2  | ns | ns | 4  | 15 | 4  | 40 | ns | ns |
| 1574 | PI572319  | <i>L. ervoides</i>     | Serbia     | ns | 4  | 1  | 4  | 20 | 3+ | 20 | ns | ns | 4  | 20 |
| 1575 | PI572320  | <i>L. ervoides</i>     | Serbia     | ns | ns | ns | 4  | 30 | 4  | 50 | ns | ns | ns | ns |
| 1580 | PI572325  | <i>L. ervoides</i>     | Croatia    | ns | ns | ns | ns | ns | 4  | 30 | 3  | 10 | ns | ns |

|      |           |                     |            |    |    |    |    |    |    |    |    |    |    |    |
|------|-----------|---------------------|------------|----|----|----|----|----|----|----|----|----|----|----|
| 1581 | PI572326  | <i>L. ervoides</i>  | Serbia     | ns | ns | ns | 3  | 15 | 4  | 40 | ns | ns | 4  | 30 |
| 1582 | PI572327  | <i>L. ervoides</i>  | Yugoslavia | ns | ns | ns | 4  | 40 | 4  | 28 | 4  | 10 | 4  | 50 |
| 1584 | PI572329  | <i>L. ervoides</i>  | Israel     | ns | 4  | 40 | 4  | 30 | 4  | 10 | 4  | 25 | ns | ns |
| 1586 | PI572331  | <i>L. ervoides</i>  | Israel     | ns | 4  | 20 | 4  | 20 | 3- | 25 | ns | ns | ;  | 0  |
| 1588 | PI572333  | <i>L. ervoides</i>  | Turkey     | ns | ns | ns | 4  | 15 | 4  | 12 | ns | ns | 4  | 20 |
| 1589 | PI572334  | <i>L. ervoides</i>  | Turkey     | ns | 4  | 20 | ns | ns | 4  | 33 | ns | ns | ns | ns |
| 1590 | PI572335  | <i>L. ervoides</i>  | Turkey     | ns | ns | ns | 4  | 30 | 4  | 10 | ns | ns | ns | ns |
| 1591 | PI572336  | <i>L. ervoides</i>  | Turkey     | ns | ns | ns | 4  | 32 | 4  | 22 | 4  | 50 | 4  | ns |
| 1592 | PI572337  | <i>L. ervoides</i>  | Turkey     | ns | ns | ns | ns | ns | 4  | 28 | ns | ns | 4  | 40 |
| 1593 | PI572338  | <i>L. ervoides</i>  | Turkey     | ns | ns | ns | 4  | 1  | ns | ns | 4  | 5  | 4  | 10 |
| 1594 | PI572339  | <i>L. ervoides</i>  | Turkey     | ns | 4  | 5  | 4  | 40 | ns | ns | ns | ns | 4  | 30 |
| 1661 | BCU001511 | <i>L. lamottei</i>  | Spain      | ns | 4  | 1  | 4  | 10 | 4  | 15 | 4  | 5  | ns | ns |
| 1665 | BCU001527 | <i>L. lamottei</i>  | Spain      | ns | 4  | 15 | 4  | 25 | 4  | 17 | 4  | 10 | 4  | 25 |
| 1302 | ILWL26    | <i>L. nigricans</i> | Syria      | 10 | 4  | 23 | 4  | 43 | 4  | 30 | 4  | 20 | 4  | 8  |
| 1303 | ILWL31    | <i>L. nigricans</i> | Syria      | 11 | ns | ns | 4  | 19 | 4  | 19 | 4  | 15 | 4  | 20 |
| 1311 | ILWL38    | <i>L. nigricans</i> | Syria      | 1  | ns | 1  | 4  | 13 | 4  | 6  | 4  | 19 | 3  | 2  |
| 1595 | PI572342  | <i>L. nigricans</i> | France     | ns | ns | 0  | 4  | 10 | 4  | 35 | ns | ns | ns | ns |
| 1596 | PI572344  | <i>L. nigricans</i> | Spain      | ns | ns | ns | 4  | 20 | 4  | 20 | ns | ns | ns | ns |
| 1597 | PI572346  | <i>L. nigricans</i> | Italy      | ns | ns | ns | 4  | 5  | ns | ns | 4  | 30 | 4  | 60 |
| 1598 | PI572348  | <i>L. nigricans</i> | Yugoslavia | ns | ns | ns | 4  | 50 | 4  | 20 | ns | ns | ns | ns |
| 1599 | PI572349  | <i>L. nigricans</i> | Serbia     | ns | ns | 0  | 1  | 5  | ;  | 0  | ns | ns | ;  | 0  |
| 1602 | PI572352  | <i>L. nigricans</i> | France     | ns | 4  | 15 | 4  | 23 | 4  | 40 | 4  | 30 | ns | ns |
| 1603 | PI572355  | <i>L. nigricans</i> | Spain      | ns | ns | ns | 4  | 30 | ns | ns | 4  | 30 | ns | ns |
| 1604 | PI572356  | <i>L. nigricans</i> | Spain      | ns | ns | ns | 4  | 18 | 4  | 20 | 4  | 10 | 4  | 8  |
| 1607 | PI572366  | <i>L. nigricans</i> | Turkey     | ns | ns | ns | 4  | 5  | ns | ns | 4  | 20 | 4  | 25 |
| 1643 | BCU001413 | <i>L. nigricans</i> | Spain      | ns | 4  | 30 | 4  | 23 | 4  | 18 | 4  | 15 | 4  | 50 |
| 1644 | BCU001415 | <i>L. nigricans</i> | Yugoslavia | ns | ns | ns | 4  | 38 | 4  | 33 | ns | ns | 4  | 50 |
| 1653 | BCU001424 | <i>L. nigricans</i> | Spain      | ns | 4  | 33 | 4  | 45 | 4  | 30 | 4  | 40 | 4  | 20 |
| 1654 | BCU001425 | <i>L. nigricans</i> | Spain      | ns | ns | 2  | 4  | 15 | 4  | 33 | 4  | 50 | 4  | 23 |
| 1655 | BCU001426 | <i>L. nigricans</i> | Spain      | ns | 4  | 15 | 4  | 35 | 4  | 25 | 4  | 20 | ns | ns |
| 1656 | BCU001428 | <i>L. nigricans</i> | Spain      | ns | 4  | 23 | 4  | 28 | 1+ | 15 | 4  | 5  | 2  | 5  |
| 1657 | BCU001429 | <i>L. nigricans</i> | Spain      | ns | 4  | 1  | 4  | 27 | 4  | 20 | 4  | 60 | 4  | 33 |
| 1658 | BCU001430 | <i>L. nigricans</i> | Spain      | ns | ns | 1  | 4  | 5  | 4  | 5  | ns | ns | 4  | 15 |
| 1659 | BCU001431 | <i>L. nigricans</i> | Spain      | ns | 4  | 1  | 4  | 35 | 4  | 35 | ns | ns | 4  | 15 |
| 1660 | BCU001510 | <i>L. nigricans</i> | Spain      | ns | 4  | 5  | 4  | 38 | 4  | 35 | ns | ns | 4  | 33 |
| 1662 | BCU001524 | <i>L. nigricans</i> | Spain      | ns | ns | ns | 4  | 35 | 4  | 28 | 4  | 40 | 4  | 5  |
| 1663 | BCU001525 | <i>L. nigricans</i> | Spain      | ns | 4  | 10 | 4  | 25 | 4  | 20 | ns | ns | 4  | 35 |
| 1664 | BCU001526 | <i>L. nigricans</i> | Spain      | ns | 4  | 14 | 4  | 35 | 4  | 20 | ns | ns | ns | ns |
| 1666 | BCU001551 | <i>L. nigricans</i> | Spain      | ns | 4  | 5  | 4  | 27 | 4  | 12 | 4  | 35 | 4  | 5  |

|      |           |                     |       |    |   |    |    |    |   |    |    |    |    |    |
|------|-----------|---------------------|-------|----|---|----|----|----|---|----|----|----|----|----|
| 1667 | BCU001577 | <i>L. nigricans</i> | Spain | ns | 4 | 40 | ns | ns | 4 | 40 | ns | ns | 4  | 28 |
| 1668 | BCU001887 | <i>L. nigricans</i> | Spain | ns | 4 | 35 | 4  | 43 | 4 | 25 | 4  | 30 | ns | ns |
| 1669 | BCU001890 | <i>L. nigricans</i> | Spain | ns | 4 | 20 | 4  | 18 | 4 | 23 | ns | ns | 4  | 15 |
| 1670 | BCU001894 | <i>L. nigricans</i> | Spain | ns | 4 | 23 | ns | ns | 4 | 25 | ns | ns | 4  | 5  |
| 1671 | BCU001896 | <i>L. nigricans</i> | Spain | ns | 4 | 20 | 4  | 15 | 4 | 13 | ns | ns | ns | ns |
| 1672 | BCU001900 | <i>L. nigricans</i> | Spain | ns | 4 | 33 | 4  | 35 | 4 | 20 | 4  | 30 | 4  | 18 |
| 1672 | BCU001900 | <i>L. nigricans</i> | Spain | ns | 4 | 33 | 4  | 35 | 4 | 20 | 4  | 30 | 4  | 18 |
| 1673 | BCU001901 | <i>L. nigricans</i> | Spain | ns | 4 | 15 | 4  | 15 | 4 | 7  | ns | ns | ns | ns |

---
